# Supplementary material for: Deficient Decision Making in Pathological Gamblers Correlates With Gray Matter Volume in Medial Orbitofrontal Cortex
Source: PubMed Central journal article supplement (PMC7064713; doi:10.3389/fpsyt.2020.00109), 2020-03-04
Supplement: DataSheet_1.pdf [file DataSheet_1.pdf]

## Supplementary Material

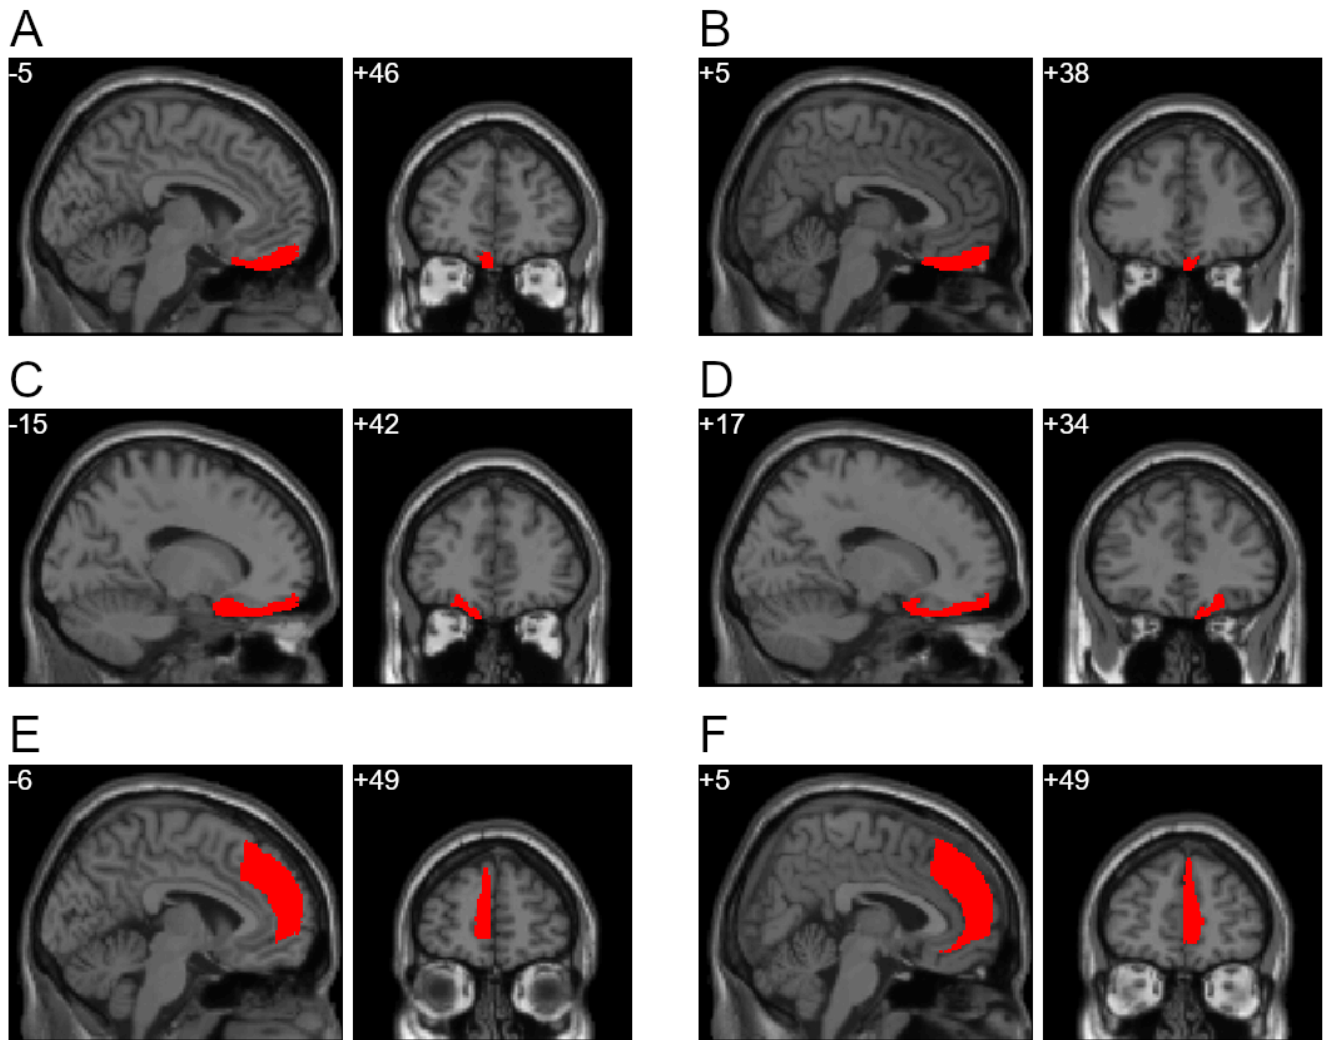

**Figure S1.** Regions of interest (ROIs) for gray matter volume (GMV) analyses included (A) left rectus gyri ( $3078 \text{ mm}^3$ ), (B) right rectus gyri ( $2926 \text{ mm}^3$ ), (C) left medial orbital gyri ( $5653 \text{ mm}^3$ ), (D) right medial orbital gyri ( $5542 \text{ mm}^3$ ), (E) left medial superior frontal gyri ( $10118 \text{ mm}^3$ ) and (F) right medial superior frontal gyri ( $11991 \text{ mm}^3$ ) as defined in the Neuromorphometrics atlas (provided by Neuromorphometrics, Inc.).

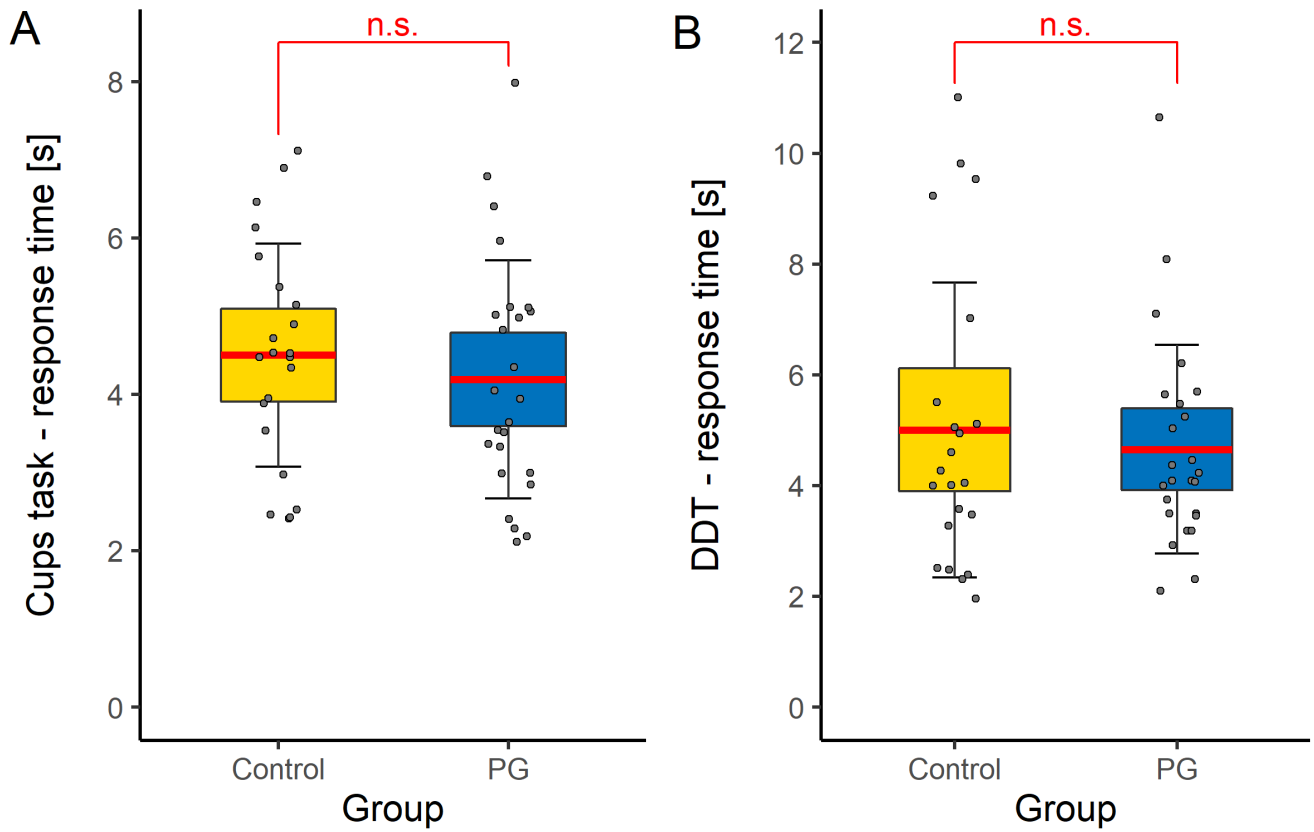

**Figure S2.** Response times did not differ between groups in the (A) cups task (Controls:  $M = 4.50$  s; PG:  $M = 4.19$  s;  $t(45) = 0.71$ ,  $p = 0.478$ ,  $d = 0.21$ ) and (B) the DDT (Controls:  $M = 5.01$  s; PG:  $M = 4.66$  s;  $t(45) = 0.53$ ,  $p = 0.602$ ,  $d = 0.15$ ).

**Table S1.** Group differences for cortical thickness between PG patients (n = 25) and controls (n = 22) in predefined prefrontal ROIs.

| ROI                      | <i>F</i> | <i>p</i> | $\eta^2$ |
|--------------------------|----------|----------|----------|
| L superior frontal gyrus | 1.55     | 0.220    | 0.03     |
| R superior frontal gyrus | 1.41     | 0.242    | 0.03     |
| L medial orbital sulcus  | 2.25     | 0.141    | 0.05     |
| R medial orbital sulcus  | 0.25     | 0.616    | 0.01     |
| L gyrus rectus           | 0.00     | 0.984    | 0.00     |
| R gyrus rectus           | 0.08     | 0.784    | 0.00     |

Notes. L = left; R = right; Covariates included age.

**Table S2.** Regression results for GMV in predefined prefrontal ROIs.

| ROI                             | Coefficients | $\beta$ | <i>p</i> |
|---------------------------------|--------------|---------|----------|
| L medial superior frontal gyrus | SBS          | -0.04   | 0.774    |
|                                 | SBS x Group  | 0.07    | 0.818    |
| R medial superior frontal gyrus | SBS          | -0.17   | 0.291    |
|                                 | SBS x Group  | 0.12    | 0.708    |
| L medial orbital gyrus          | SBS          | 0.02    | 0.905    |
|                                 | SBS x Group  | -0.54   | 0.114    |
| R medial orbital gyrus          | SBS          | -0.13   | 0.424    |
|                                 | SBS x Group  | -0.22   | 0.522    |
| L gyrus rectus                  | SBS          | 0.14    | 0.371    |
|                                 | SBS x Group  | -0.13   | 0.676    |
| R gyrus rectus                  | SBS          | -0.09   | 0.592    |
|                                 | SBS x Group  | 0.17    | 0.622    |

Notes. L = left; R = right; Covariates included TIV and age; Controls: n = 22; PG: n = 22.

**Table S3.** Regression results for cortical thickness in predefined prefrontal ROIs.

|                | ROI                      | Coefficients           | $\beta$ | $p$     |
|----------------|--------------------------|------------------------|---------|---------|
| EV sensitivity | L superior frontal gyrus | EV sensitivity         | -0.34   | 0.179   |
|                |                          | EV sensitivity x Group | 0.53    | 0.091   |
|                | R superior frontal gyrus | EV sensitivity         | -0.31   | 0.218   |
|                |                          | EV sensitivity x Group | 0.56    | 0.073   |
|                | L medial orbital sulcus  | EV sensitivity         | -0.02   | 0.946   |
|                |                          | EV sensitivity x Group | 0.02    | 0.950   |
|                | R medial orbital sulcus  | EV sensitivity         | 0.41    | 0.162   |
|                |                          | EV sensitivity x Group | -0.82   | 0.024 * |
|                | L gyrus rectus           | EV sensitivity         | -0.30   | 0.322   |
|                |                          | EV sensitivity x Group | 0.01    | 0.975   |
|                | R gyrus rectus           | EV sensitivity         | -0.14   | 0.628   |
|                |                          | EV sensitivity x Group | 0.00    | 0.993   |
| SBS            | L superior frontal gyrus | SBS                    | 0.02    | 0.929   |
|                |                          | SBS x Group            | 0.03    | 0.939   |
|                | R superior frontal gyrus | SBS                    | 0.14    | 0.406   |
|                |                          | SBS x Group            | 0.05    | 0.887   |
|                | L medial orbital sulcus  | SBS                    | -0.13   | 0.465   |
|                |                          | SBS x Group            | 0.31    | 0.404   |
|                | R medial orbital sulcus  | SBS                    | -0.35   | 0.069   |
|                |                          | SBS x Group            | 0.19    | 0.620   |
|                | L gyrus rectus           | SBS                    | -0.52   | 0.004 * |
|                |                          | SBS x Group            | -0.07   | 0.850   |
|                | R gyrus rectus           | SBS                    | -0.22   | 0.235   |
|                |                          | SBS x Group            | -0.24   | 0.522   |

Notes. L = left; R = right; Covariates included age; Controls n = 22; PG n = 22; \*  $p < 0.05$

**Table S4.** Correlations between GMV in predefined prefrontal ROIs and SBS choices separately for PG patients and controls.

| Group              | ROI                             | SBS choices |          |
|--------------------|---------------------------------|-------------|----------|
|                    |                                 | <i>r</i>    | <i>p</i> |
| Controls<br>n = 22 | L medial superior frontal gyrus | -0.03       | 0.916    |
|                    | R medial superior frontal gyrus | -0.26       | 0.273    |
|                    | L medial orbital gyrus          | 0.02        | 0.939    |
|                    | R medial orbital gyrus          | -0.17       | 0.475    |
|                    | L gyrus rectus                  | 0.29        | 0.209    |
|                    | R gyrus rectus                  | -0.08       | 0.731    |
| PG<br>n = 22       | L medial superior frontal gyrus | 0.01        | 0.973    |
|                    | R medial superior frontal gyrus | -0.01       | 0.971    |
|                    | L medial orbital gyrus          | -0.45       | 0.049 *  |
|                    | R medial orbital gyrus          | -0.31       | 0.177    |
|                    | L gyrus rectus                  | 0.02        | 0.930    |
|                    | R gyrus rectus                  | 0.05        | 0.818    |

Notes. L = left; R = right; Covariates included TIV and age; \*  $p < 0.05$

**Table S5.** Correlations between cortical thickness in predefined prefrontal ROIs and EV sensitivity or SBS choices separately for PG patients and controls.

| Group              | ROI                      | EV sensitivity |          |
|--------------------|--------------------------|----------------|----------|
|                    |                          | <i>r</i>       | <i>p</i> |
| Controls<br>n = 22 | L superior frontal gyrus | -0.29          | 0.203    |
|                    | R superior frontal gyrus | -0.26          | 0.251    |
|                    | L medial orbital sulcus  | 0.05           | 0.844    |
|                    | R medial orbital sulcus  | 0.31           | 0.170    |
|                    | L gyrus rectus           | -0.21          | 0.367    |
|                    | R gyrus rectus           | -0.11          | 0.650    |
| PG<br>n = 22       | L superior frontal gyrus | 0.31           | 0.169    |
|                    | R superior frontal gyrus | 0.37           | 0.097    |
|                    | L medial orbital sulcus  | -0.01          | 0.950    |
|                    | R medial orbital sulcus  | -0.34          | 0.129    |
|                    | L gyrus rectus           | -0.32          | 0.153    |
|                    | R gyrus rectus           | -0.14          | 0.557    |
| Group              | ROI                      | SBS choices    |          |
|                    |                          | <i>r</i>       | <i>p</i> |
| Controls<br>n = 22 | L superior frontal gyrus | 0.02           | 0.918    |
|                    | R superior frontal gyrus | 0.17           | 0.466    |
|                    | L medial orbital sulcus  | -0.21          | 0.361    |
|                    | R medial orbital sulcus  | -0.40          | 0.074    |
|                    | L gyrus rectus           | -0.52          | 0.016 *  |
|                    | R gyrus rectus           | -0.31          | 0.169    |
| PG<br>n = 22       | L superior frontal gyrus | 0.06           | 0.808    |
|                    | R superior frontal gyrus | 0.17           | 0.453    |
|                    | L medial orbital sulcus  | 0.08           | 0.726    |
|                    | R medial orbital sulcus  | -0.04          | 0.852    |
|                    | L gyrus rectus           | -0.48          | 0.029 *  |
|                    | R gyrus rectus           | -0.28          | 0.217    |

Notes. L = left; R = right; Covariates included age; \*  $p < 0.05$
